# Supplementary material
Source: PubMed Central journal article supplement (PMC3249680)
Supplement: supp_en.2011-1339_en-11-1339_Supplemental_table_1_revised.pdf [file supp_en.2011-1339_en-11-1339_Supplemental_table_1_revised.pdf]

Supplemental Table

**Real Time quantitative PCR:** The relative expression levels were calculated by the comparative Ct method. Primer sequences used were as follows:

| Gene                | Primer                             |
|---------------------|------------------------------------|
| Pgc1 $\alpha$ F     | CCC TGC CAT TGT TAA GAC C          |
| Pgc1 $\alpha$ R     | TGC TGC TGT TCC TGT TTT C          |
| PPAR $\alpha$ F     | CTGCAGAGCAACCATCCAGAT              |
| PPAR $\alpha$ R     | GTGACCTTCGATTATGCGATCA             |
| PPAR $\beta$ F      | GCA GCC TCT TCC TCA ATG AC         |
| PPAR $\beta$ R      | GTA CTG GCT GTC AGG GTG GT         |
| ACOX1 F             | CCG CCA CCT TCA ATC CAG            |
| ACOX1 R             | ACT CTT GGG TCT TGG GGT CA         |
| HMG-CoA Synthase F  | TGCACGGATCGTGAAGACA                |
| HMG-CoA Synthase R  | GTCTCTCCATCAGTTTCTGAACCA           |
| Ketothiolase F      | TCACGGCAGAAGCAGGATGC               |
| Ketothiolase R      | TGCTCCATCACTCACCTGACTG             |
| SREBP-1c F          | GGC CGA GAT GTG CGA ACT            |
| SREBP-1c R          | TTG TTG ATG AGC TGG AGC ATG T      |
| ATP citrate lyase F | GCC AGC GGG AGC ACA TC             |
| ATP citrate lyase R | CTT TGC AGG TGC CAC TTC ATC        |
| Scd-1 F             | CCG GAG ACC CCT TAG ATC GA         |
| Scd-1 R             | TAG CCT GTA AAA GAT TTC TGC AAA CC |
| FASN F              | GCT GCG GAA ACT TCA GGA AAT        |
| FASN R              | AGA GAC GTG TCA CTC CTG GAC TT     |
| GPAT F              | ATCCAACACCATCCCTGACATC             |
| GPAT R              | AGTGACCTTCGATTATTCGATCA            |
| PEPCK F             | CCA CAG CTG CTG CAG AAC A          |
| PEPCK R             | GAA GGG TCG CAT GGC AAA            |
